# Supplementary material for: Size-controlled nitrogen-containing mesoporous carbon nanospheres by one-step aqueous self-assembly strategy
Source: Royal Society of Chemistry journal article supplement (doi:10.1039/c4ta05820h), 2014-12-01
Supplement: c4ta05820h1.pdf [file c4ta05820h1.pdf]

Supplementary Material (ESI) for Journal of Material Chemistry

This journal is © The Royal Society of Chemistry 2014

## Electronic Supplementary Information

### Size-controlled nitrogen-containing mesoporous carbon nanospheres

#### by one-step aqueous self-assembly strategy†

*Jia Wang,<sup>a</sup> Hongyang Liu,<sup>a</sup> Jiangyong Diao,<sup>a</sup> Xianmo Gu,<sup>a</sup> Haihua Wang,<sup>a</sup> Junfeng Rong,<sup>b</sup> Baoning Zong,<sup>b</sup> Dang Sheng Su<sup>\*a</sup>*

<sup>a</sup>Shenyang National Laboratory for Materials Science, Institute of Metal Research, Chinese Academy of Sciences, 72 Wenhua Road, Shenyang 110016, P.R. China.

<sup>b</sup>Research Institute of Petroleum Processing, 18 Xueyuan Road, Haidian District, Beijing, 100083, PR China.

\* Corresponding author. E-mail: dangsheng@fhi-berlin.mpg.de, dssu@imr.ac.cn

**Table S1** Synthesis parameters, particle size of spherical nitrogen-containing resols-F127 composites (APS)

| Sample | Ammonia<br>(M) | F127<br>(mM) | H <sub>2</sub> O<br>(ml) | HMT<br>(mmol) | MAP<br>(mmol) | TMB<br>(mmol) | Particle Size<br>(nm) |
|--------|----------------|--------------|--------------------------|---------------|---------------|---------------|-----------------------|
| APS-1  | 0.37           | 0            | 52                       | 5             | 10            | -             | -                     |
| APS-2  | 0.37           | 1.5          | 52                       | 5             | 10            | -             | -                     |
| APS-3  | 0.37           | 3.8          | 52                       | 5             | 10            | -             | -                     |
| APS-4  | 0.37           | 4.6          | 52                       | 5             | 10            | -             | 324±45                |
| APS-5  | 0.37           | 5.3          | 52                       | 5             | 10            | -             | 136±14                |
| APS-6  | 0.37           | 6.1          | 52                       | 5             | 10            | -             | -                     |
| APS-7  | 0              | 4.6          | 52                       | 5             | 10            | -             | -                     |
| APS-8  | 0.14           | 4.6          | 52                       | 5             | 10            | -             | -                     |
| APS-9  | 0.57           | 4.6          | 52                       | 5             | 10            | -             | 302±31                |
| APS-10 | 0.71           | 4.6          | 52                       | 5             | 10            | -             | 221±28                |
| APS-11 | 0.86           | 4.6          | 52                       | 5             | 10            | -             | 202±16                |
| APS-12 | 0.37           | 4.6          | 52                       | 5             | 10            | 3.3           | -                     |

**Table S2** Texture properties of NMCS with different particle sizes.

| Sample      | Particle size<br>(nm) | Pore Size<br>(nm) | $V_{\text{micro}}$<br>( $\text{cm}^3 \text{g}^{-1}$ ) | $S_{\text{BET}}$<br>( $\text{m}^2 \text{g}^{-1}$ ) | $V_{\text{t}}$<br>( $\text{cm}^3 \text{g}^{-1}$ ) |
|-------------|-----------------------|-------------------|-------------------------------------------------------|----------------------------------------------------|---------------------------------------------------|
| NMCS-1-600  | -                     | -                 | 0.15                                                  | 403                                                | 0.19                                              |
| NMCS-7-600  | -                     | 4.7               | 0.14                                                  | 497                                                | 0.32                                              |
| NMCS-8-600  | -                     | 4.7               | 0.14                                                  | 517                                                | 0.33                                              |
| NMCS-4-600  | 225 ± 23              | 4.2               | 0.14                                                  | 497                                                | 0.36                                              |
| NMCS-9-600  | 163 ± 23              | 4.0               | 0.14                                                  | 469                                                | 0.38                                              |
| NMCS-10-600 | 143 ± 17              | 4.0               | 0.15                                                  | 532                                                | 0.41                                              |
| NMCS-11-600 | 119 ± 14              | 4.0               | 0.17                                                  | 595                                                | 0.50                                              |
| NMCS-5-600  | 97 ± 13               | 4.0               | 0.18                                                  | 629                                                | 0.57                                              |
| NMCS-4-800  | 164 ± 23              | 4.2               | 0.24                                                  | 793                                                | 0.54                                              |
| NMCS-12-600 | ~100                  | 5.1               | 0.13                                                  | 492                                                | 0.52                                              |

**Table S3** Elemental composition of the typical samples from Elemental analysis and XPS spectra.

| Sample               | XPS        |            |            |       | Elemental analysis |            |            |            |                   |
|----------------------|------------|------------|------------|-------|--------------------|------------|------------|------------|-------------------|
|                      | C<br>(at%) | N<br>(at%) | O<br>(at%) | N/C   | C<br>(wt%)         | N<br>(wt%) | O<br>(wt%) | H<br>(wt%) | C/N/H/O           |
| APS-4                | 74.3       | 5.1        | 20.6       | 0.069 | 65.9               | 3.8        | 23         | 7.3        | 100/5.8/11.1/24.9 |
| NMCS-1-600           | 87.2       | 5.3        | 7.4        | 0.061 | 82.4               | 7.4        | 8.5        | 1.7        | 100/9.0/2.1/10.3  |
| NMCS-4-600           | 88.0       | 4.5        | 7.4        | 0.051 | 81.5               | 7.3        | 9.3        | 1.9        | 100/8.9/2.3/11.4  |
| NMCS-4-800           | 91.2       | 3.1        | 5.7        | 0.033 | 86.0               | 4.4        | 8.4        | 1.2        | 100/5.11/9.8/1.4  |
| CMK-3                | 95.4       | -          | 4.2        | 0     | -                  | -          | -          | -          | -                 |
| N-CMK-3 <sup>a</sup> | 93.9       | 1.3        | 4.8        | 0.014 | -                  | -          | -          | -          | -                 |

a: N-CMK-3 represents the nitrogen-containing CMK-3, which is synthesized through two-step method: CMK-3 is firstly oxidized by concentrated HNO<sub>3</sub> at 60 °C for 3 h and then treated by ammonia at 800 °C for 3 h.

**Table S4** Sample denotations and comparison of the fit parameters from the peaks fitted in the Raman spectra of NMCS before and after reaction.

|                    | Sample     | Description | Position<br>( $\text{cm}^{-1}$ ) | Area<br>(a.u.) | FWHM<br>( $\text{cm}^{-1}$ ) | $I_D/I_G$ |
|--------------------|------------|-------------|----------------------------------|----------------|------------------------------|-----------|
| Before<br>Reaction | NMCS-1-600 | D4          | 1195.1                           | 70793          | 191                          | 2.18      |
|                    |            | D           | 1348.8                           | 186100         | 183                          |           |
|                    |            | D3          | 1507.2                           | 102760         | 64                           |           |
|                    |            | G           | 1591.8                           | 85169          | 94                           |           |
|                    | NMCS-4-600 | D4          | 1173.5                           | 55857          | 2216                         | 2.08      |
|                    |            | D           | 1341.5                           | 189190         | 200                          |           |
|                    |            | D3          | 1503.5                           | 76090          | 60                           |           |
|                    |            | G           | 1586.7                           | 90929          | 97                           |           |
|                    | NMCS-4-800 | D4          | 1180.3                           | 147440         | 243                          | 1.98      |
|                    |            | D           | 1334.5                           | 408810         | 183                          |           |
|                    |            | D3          | 1493.7                           | 184850         | 58                           |           |
|                    |            | G           | 2582.6                           | 206130         | 95                           |           |
| After<br>Reaction  | NMCS-1-600 | D4          | 1198.6                           | 98243          | 183                          | 2.36      |
|                    |            | D           | 1348.6                           | 215070         | 173                          |           |
|                    |            | D3          | 1509.6                           | 155950         | 70                           |           |
|                    |            | G           | 1593.1                           | 91093.9        | 84                           |           |
|                    | NMCS-4-600 | D4          | 1183.4                           | 110840         | 210                          | 2.45      |
|                    |            | D           | 1340.9                           | 191380         | 189                          |           |
|                    |            | D3          | 1520.2                           | 142730         | 79                           |           |
|                    |            | G           | 1593.7                           | 78079          | 80                           |           |
|                    | NMCS-4-800 | D4          | 1169.3                           | 121450         | 90                           | 2.13      |
|                    |            | D           | 1330.6                           | 259930         | 181                          |           |
|                    |            | D3          | 1509.2                           | 164220         | 76                           |           |
|                    |            | G           | 1589.6                           | 121640         | 76                           |           |

**Table S5** C, N, O content of typical samples from XPS spectra after reaction.

| Sample     | C<br>(at %) | N<br>(at %) | O<br>(at %) | N/C   |
|------------|-------------|-------------|-------------|-------|
| NMCS-1-600 | 89.1        | 4.6         | 6.4         | 0.052 |
| NMCS-4-600 | 90.1        | 4.2         | 5.7         | 0.047 |
| NMCS-4-800 | 93.4        | 2.4         | 4.2         | 0.026 |

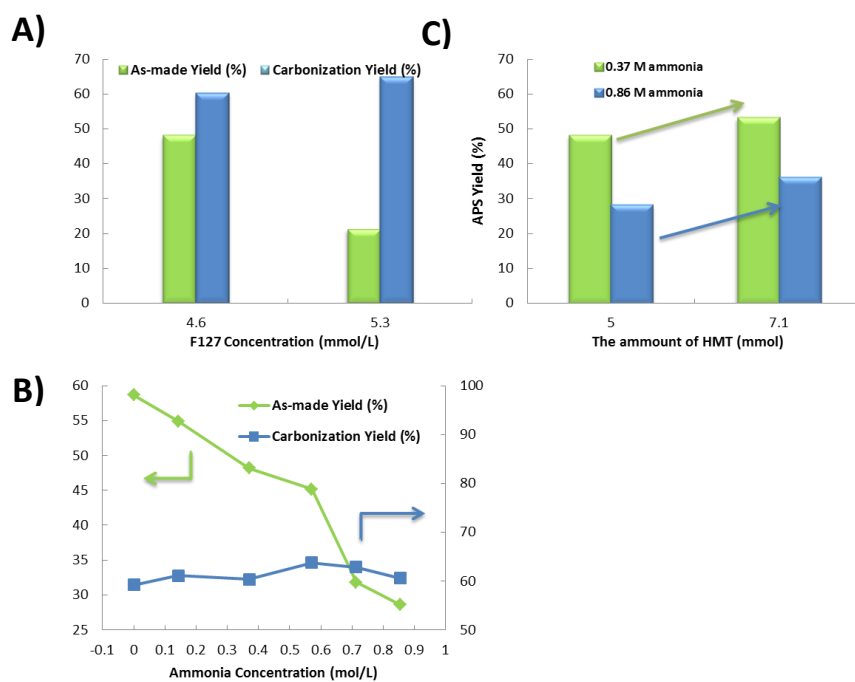

**Fig. S1** Yield variation of APS and NMCS-600 with the change of F127 concentration (A) and ammonia concentration (B); Yield variation of APS with the change of HMT amount (C).

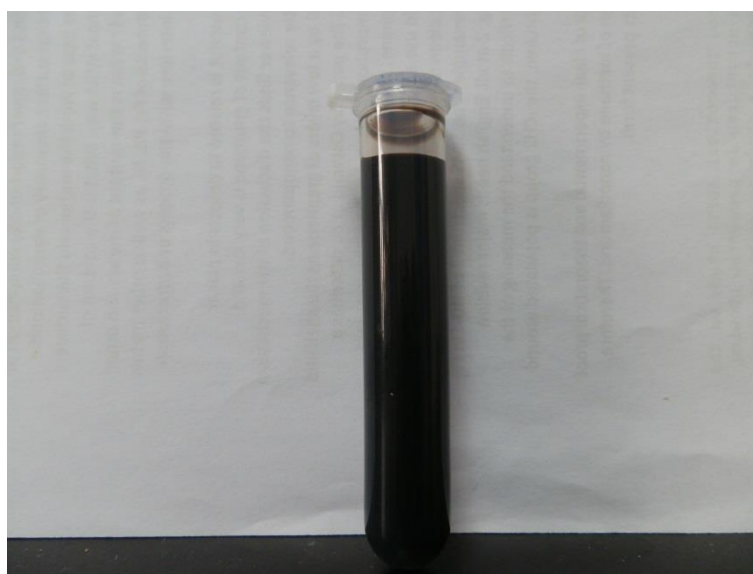

**Fig. S2** The upper solution after centrifugation. The synthesis condition: F127: 3.8 mM. 3-Aminophenol, 10 mmol; HMT, 5 mmol; ammonia concentrations: 0.37 M.

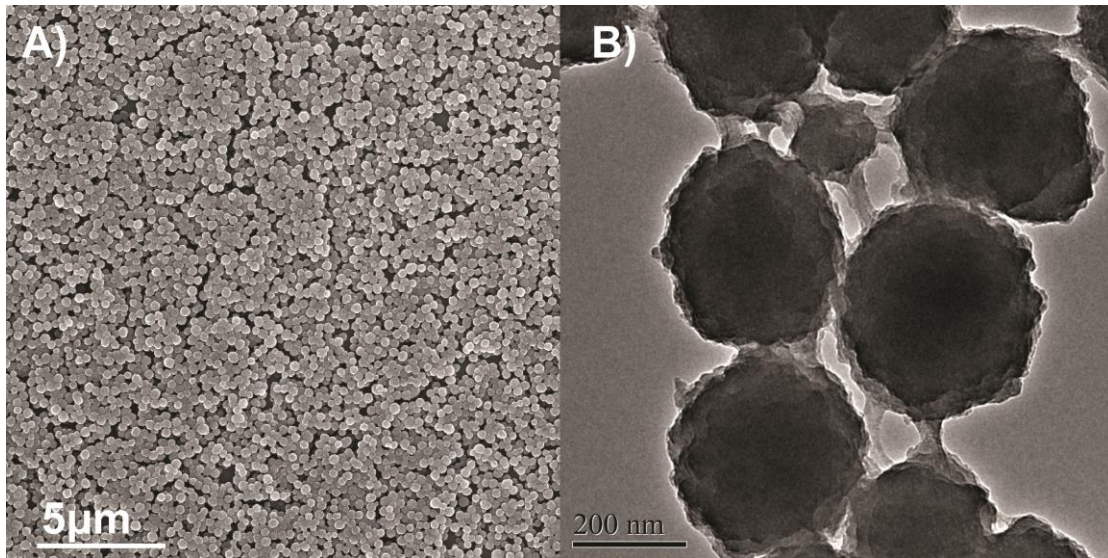

**Fig. S3** Typical SEM image (A) and TEM image (B) of APS-4.

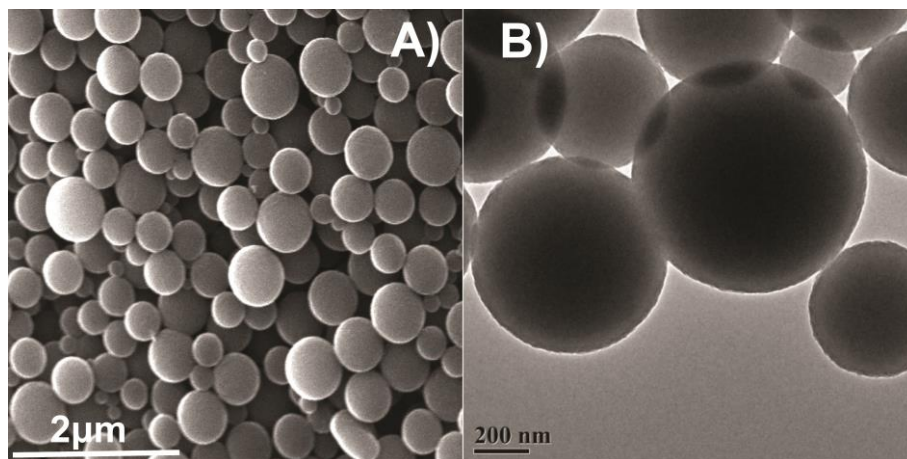

**Fig. S4** Typical SEM image (A) and TEM image (B) of NMCS-1-600.

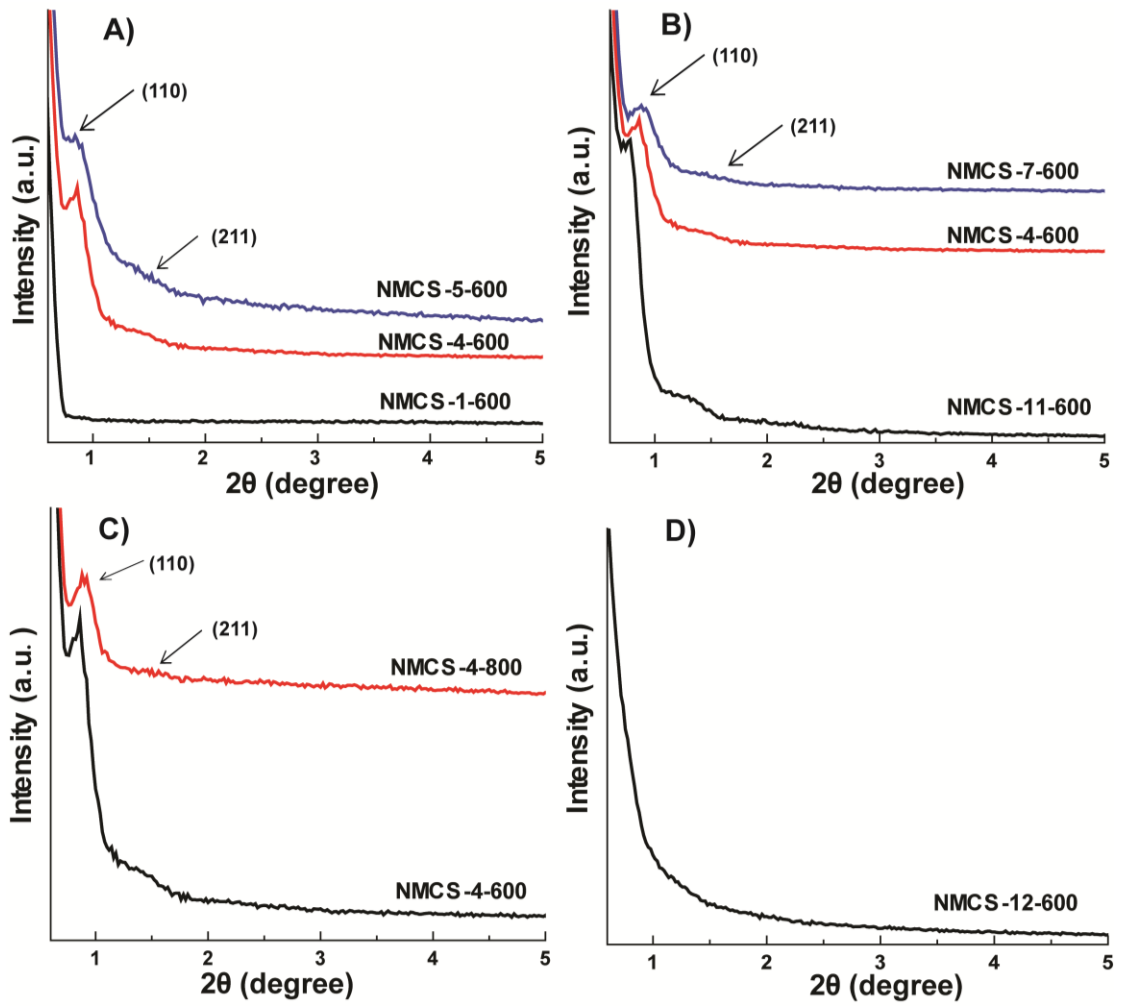

Fig. S5 Small-angle XRD patterns of the prepared NMCS with different synthesis conditions: A) different F127 concentration; B) different ammonia concentration; C) different carbonization temperature; D) adding TMB.

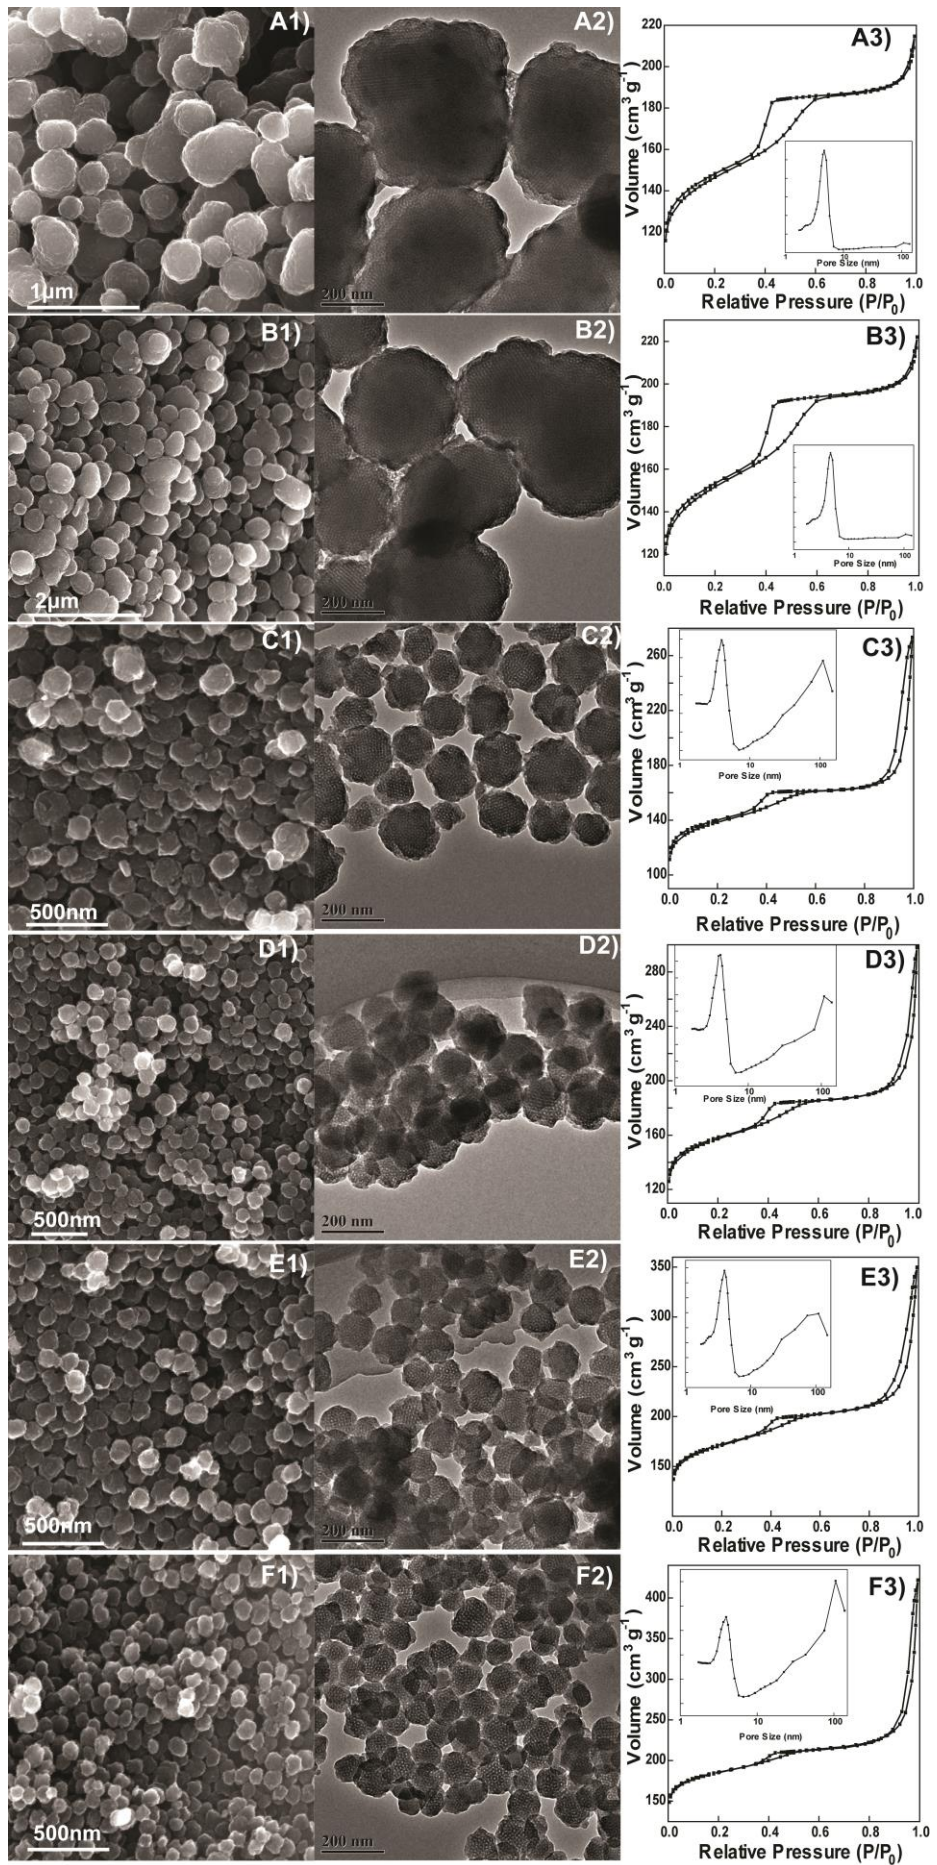

**Fig. S6** Typical SEM images (A1-F1), TEM images (A2-F2) and N<sub>2</sub> adsorption-desorption isotherms (A3-F3) of NMCS-7-600 (A1-A3), NMCS-8-600 (B1-B3), NMCS-9-600 (C1-C3), NMCS-10-600 (D1-D3), NMCS-11-600 (E1-E3) and NMCS-5-600 (F1-F3). The insets show the corresponding pore size distributions.

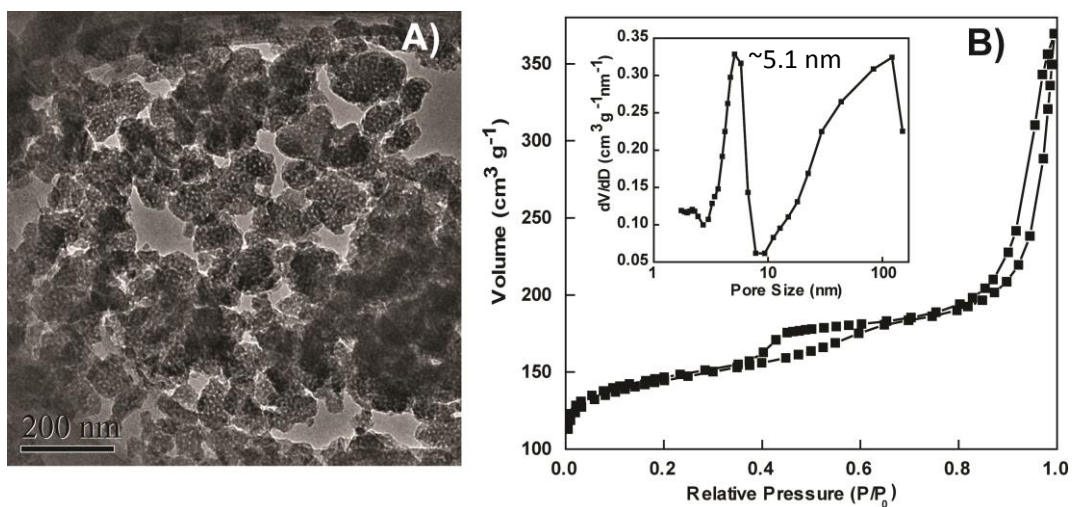

**Fig. S7** TEM image (A) and N<sub>2</sub> adsorption-desorption isotherms (B) of NMCS-12-600. The inset shows the corresponding pore size distributions.

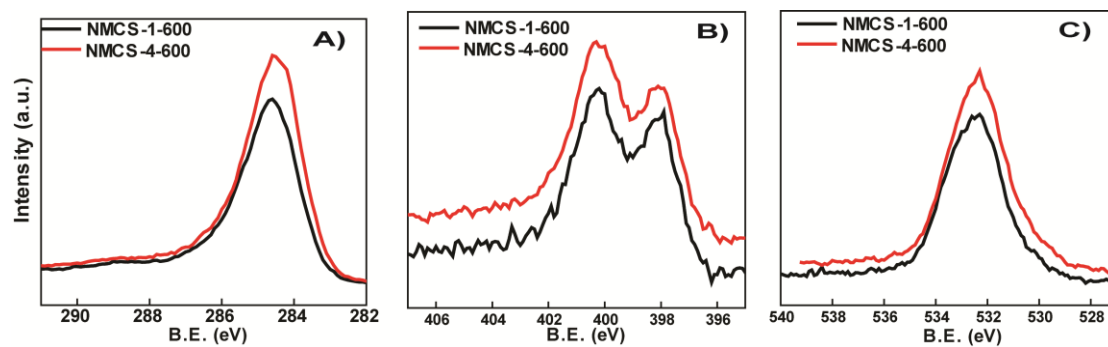

**Fig. S8** XPS spectra of C1s (A), N1s (B), and O1s (C) in NMCS-1-600 and NMCS-4-600.



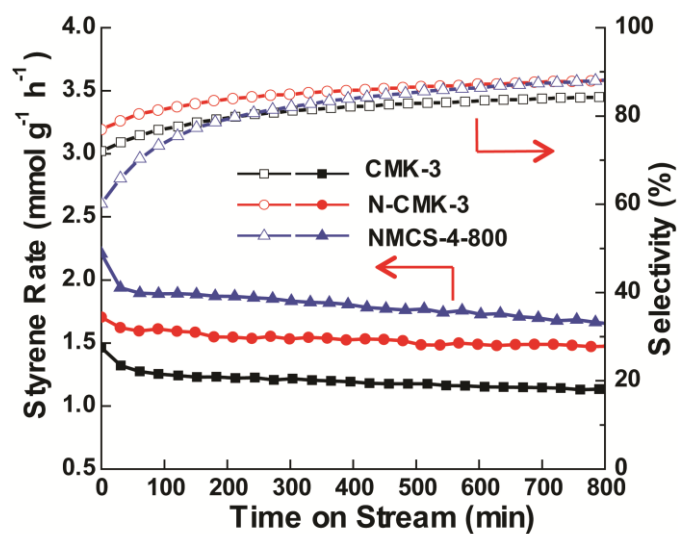

**Fig. S9** Catalytic performance of N-CMK-3 for direct dehydrogenation of ethylbenzene to styrene. Reaction conditions: 550 °C, 2.8 % of Ethylbenzene in He, 10 mL min<sup>-1</sup>, 100 mg catalyst. For comparison, we also plot the results of CMK-3 and NMCS-4-800.

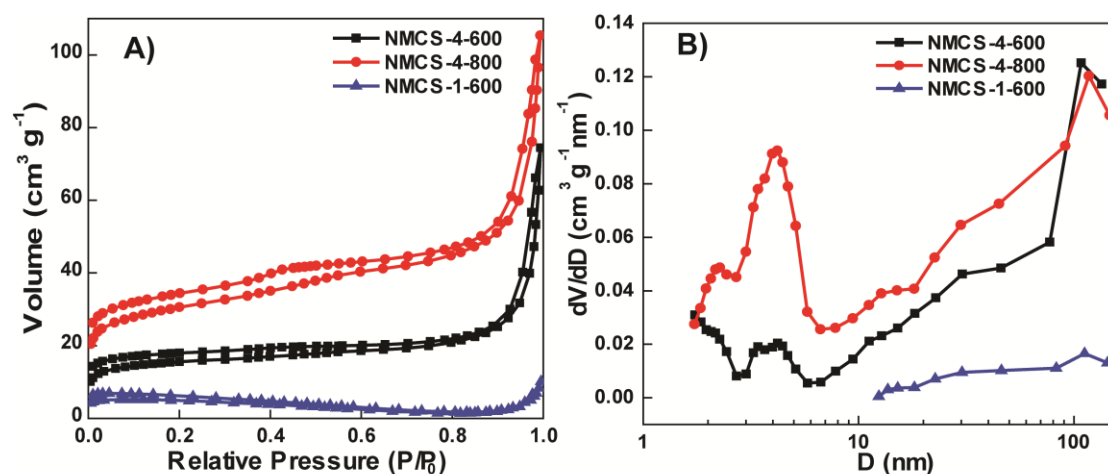

**Fig. S10** N<sub>2</sub> adsorption-desorption isotherms (A) and corresponding pore size distributions (B) of NMCS-1-600, NMCS-4-600, and NMCS-4-800 after reaction.

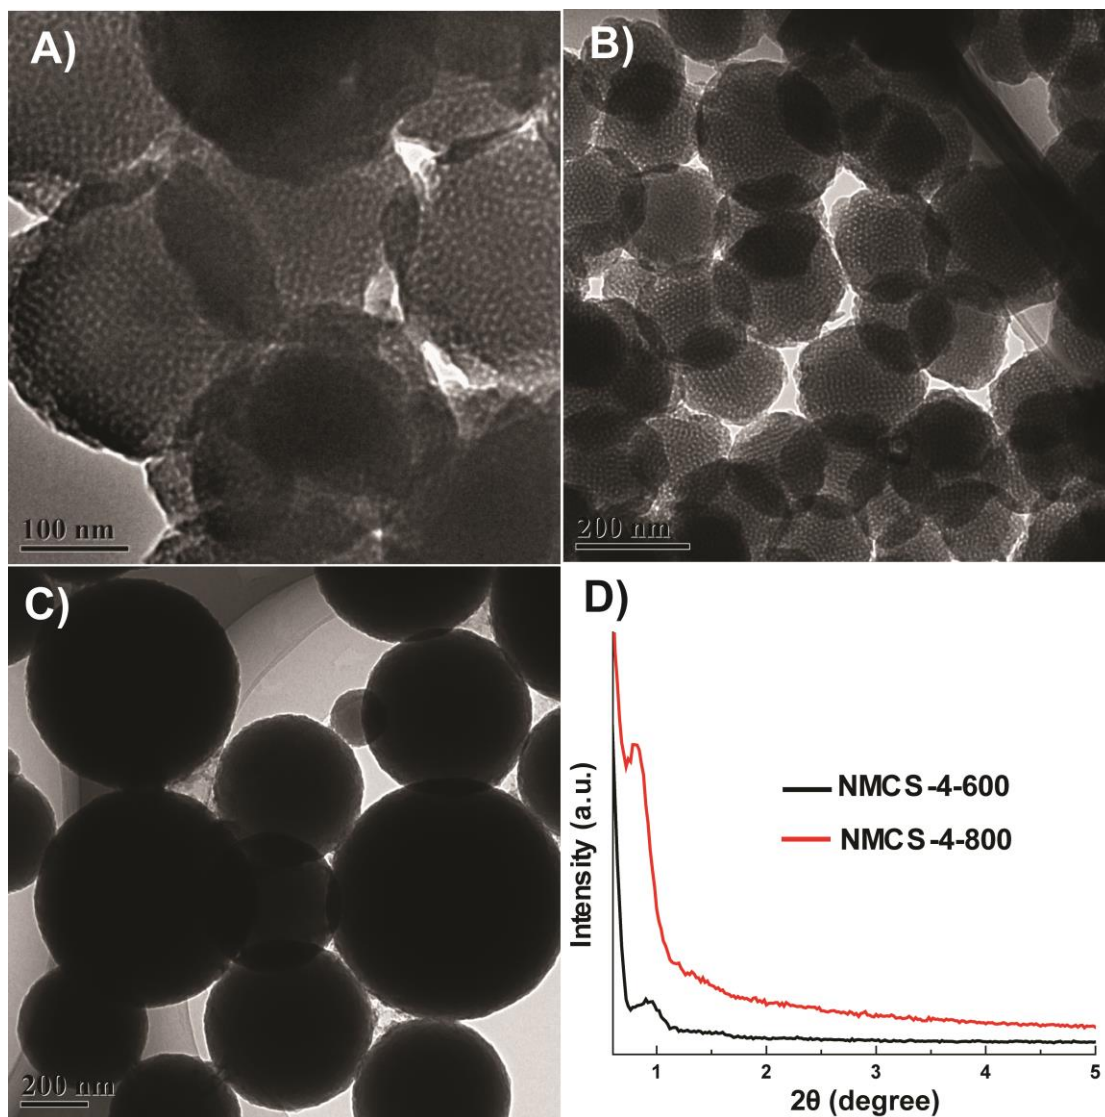

**Fig. S11** TEM images of NMCS-4-600 (A), NMCS-4-800 (B), and NMCS-1-600 (C) after reaction and small-angle XRD patterns of the catalysts after reaction (D).

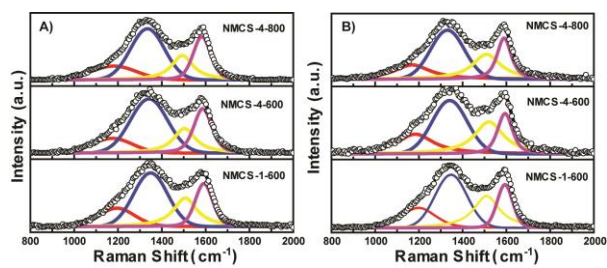

**Fig. S12** Raman spectra of NMCS samples after reaction.
